# Supplementary material
Source: PubMed Central journal article supplement (PMC5157695)
Supplement: NIHMS803924-supplement-1.pdf [file NIHMS803924-supplement-1.pdf]

## Supplementary Figure 1A

### Inflammation-Specific TLDA: CD4 Inflammation in Tissue

| Gene Symbol | Assay ID      |
|-------------|---------------|
| Ahr         | Mm01291777_m1 |
| Anxa4       | Mm01183650_m1 |
| Bcl-6       | Mm00477633_m1 |
| Ccr1        | Mm01216147_m1 |
| Ccr2        | Mm00438270_m1 |
| Ccr4        | Mm00438271_m1 |
| Ccr5        | Mm04207879_m1 |
| Ccr6        | Mm01700300_g1 |
| Ccr7        | Mm01301785_m1 |
| Ccr8        | Mm01351703_m1 |
| Ccr9        | Mm02620030_s1 |
| CD40L       | Mm00441911_m1 |
| CTLA4       | Mm00486849_m1 |
| Cxcr3       | Mm00438259_m1 |
| Cxcr4       | Mm01292123_m1 |
| Cxcr5       | Mm00432086_m1 |
| Cxcr6       | Mm00472858_m1 |
| Cxcr7       | Mm00432610_m1 |
| Ebi-3       | Mm00469294_m1 |
| Eomes       | Mm01351985_m1 |
| Fos         | Mm00487425_m1 |
| FoxP3       | Mm00475166_g1 |
| Furin       | Mm00440646_m1 |
| Gapdh       | Mm99999915_g1 |
| Gata3       | Mm00484683_m1 |
| Gfi1        | Mm00515855_m1 |
| Gzmb        | Mm00442834_m1 |
| havcr2      | Mm00454540_m1 |
| HPRT        | Mm01318747_g1 |
| ICOS        | Mm00497600_m1 |
| Ifnar1      | Mm00439544_m1 |
| Ifng        | Mm01168134_m1 |
| Ifngr1      | Mm00599890_m1 |
| Igf1r       | Mm00802831_m1 |
| Igf2r       | Mm00439576_m1 |
| Ikzf1       | Mm01187882_m1 |
| Ikzf2       | Mm00496108_m1 |
| Ikzf3       | Mm01306721_m1 |
| Ikzf4       | Mm00558871_s1 |
| IL10        | Mm01288386_m1 |
| IL10ra      | Mm00434151_m1 |
| IL12p35     | Mm00434169_m1 |
| IL12p40     | Mm01288994_g1 |
| IL12rb2     | Mm00434200_m1 |
| IL13        | Mm00434204_m1 |
| IL17        | Mm00439619_m1 |
| IL18r       | Mm00515180_m1 |
| IL1rl1      | Mm01233982_m1 |

| Gene Symbol | Assay ID      |
|-------------|---------------|
| IL2         | Mm00434255_g1 |
| IL21        | Mm00517640_m1 |
| IL21r       | Mm00600319_m1 |
| IL22        | Mm01226722_g1 |
| IL23p19     | Mm01160011_g1 |
| IL23r       | Mm00519942_m1 |
| IL27p28     | Mm00461164_m1 |
| IL27r       | Mm00497254_g1 |
| IL2ra       | Mm00434261_m1 |
| IL2rb       | Mm00434264_m1 |
| IL4         | Mm00445259_m1 |
| IL4ra       | Mm00439634_m1 |
| IL5         | Mm00439646_m1 |
| IL6         | Mm01210733_m1 |
| IL6ra       | Mm00439653_m1 |
| IL7r        | Mm00434295_m1 |
| IL9         | Mm00434304_m1 |
| Irf4        | Mm00516431_m1 |
| Jun         | Mm00495062_s1 |
| Klf9        | Mm00495172_m1 |
| Lag3        | Mm00493071_m1 |
| Lgal        | Mm00839408_g1 |
| Maf         | Mm02581355_s1 |
| Pdcd1       | Mm01285676_m1 |
| Plxna4      | Mm00558881_m1 |
| Pparg       | Mm01184322_m1 |
| Prf1        | Mm00812512_m1 |
| Rn18s       | Mm03928990_g1 |
| RORc        | Mm01261022_m1 |
| Sema3A      | Mm00436469_m1 |
| Sema4A      | Mm00443140_m1 |
| Sema4D      | Mm00443147_m1 |
| Sema4F      | Mm01181883_m1 |
| Sema6D      | Mm01334437_m1 |
| Sema7A      | Mm00441361_m1 |
| Skp2        | Mm00449925_m1 |
| Socs2       | Mm01247834_m1 |
| Tbx21       | Mm00450960_m1 |
| Tgfb1       | Mm00441729_g1 |
| Tgfb2       | Mm03024091_m1 |
| Tgfb3       | Mm03053837_s1 |
| Timd2       | Mm00506693_m1 |
| Tnfr        | Mm01309635_m1 |
| Tnfrsf18    | Mm00437136_m1 |
| Tnfrsf1b    | Mm00441889_m1 |
| Tnfrsf4     | Mm00442039_m1 |
| Tnfrsf9     | Mm00441899_m1 |
| Tnfsf11     | Mm00441908_m1 |

List of 96 genes: 93 genes of interest and 3 endogenous controls (GAPDH, HPRT and Rn18s) are included in a custom designed microfluidics card, TLDA (Taqman Low Density Array). Gene symbol (right) and Taqman assay ID for each gene is listed.

## Supplementary Figure 1A

### Treg-Specific TLDA: Treg Signature Genes

| Gene Symbol | Assay ID      |
|-------------|---------------|
| Adam19      | Mm00477337_m1 |
| Ahr         | Mm01291777_m1 |
| Arhgap20    | Mm00615839_m1 |
| Arhgef12    | Mm00804321_m1 |
| Bhlhb2      | Mm00478593_m1 |
| Capn3       | Mm00482978_m1 |
| Cd200       | Mm00487740_m1 |
| CD36        | Mm01135198_m1 |
| Cerk        | Mm00461054_m1 |
| Cish        | Mm00515488_m1 |
| Cpe         | Mm00516341_m1 |
| CTLA4       | Mm00486849_m1 |
| Dgat1       | Mm00515643_m1 |
| Dnahc12     | Mm01210451_m1 |
| Dst         | Mm00467166_m1 |
| Dusp4       | Mm00723761_m1 |
| Ecm1        | Mm00514634_m1 |
| Eef2k       | Mm00432996_m1 |
| Entpd1      | Mm00515447_m1 |
| Folr4       | Mm00491664_m1 |
| FoxP3       | Mm00475166_g1 |
| Frmd4b      | Mm00520190_m1 |
| Gapdh       | Mm99999915_g1 |
| Gata1       | Mm01352636_m1 |
| Gbp1        | Mm00657086_m1 |
| Gbp3        | Mm00497606_m1 |
| Gfi1        | Mm00515855_m1 |
| Gnaq        | Mm00492381_m1 |
| Gpr15       | Mm01346276_g1 |
| Gpr177      | Mm00509695_m1 |
| Gpr83       | Mm00439103_m1 |
| Hipk2       | Mm00439329_m1 |
| Hmgn3       | Mm00518151_m1 |
| HPRT        | Mm01318747_g1 |
| Igf1r       | Mm00802831_m1 |
| Igf2r       | Mm00439576_m1 |
| Ikzf2       | Mm00496108_m1 |
| Ikzf4       | Mm00558871_s1 |
| Il1r1       | Mm01233982_m1 |
| IL2ra       | Mm00434261_m1 |
| IL2rb       | Mm00434264_m1 |
| Itgae       | Mm00434443_m1 |
| Itgb8       | Mm00623991_m1 |
| Itih5       | Mm00552678_m1 |
| Klf9        | Mm00495172_m1 |
| Klrg1       | Mm00516879_m1 |
| Map3k8      | Mm00432637_m1 |
| Mdfig       | Mm00612985_m1 |

| Gene Symbol | Assay ID      |
|-------------|---------------|
| Melk        | Mm00487680_m1 |
| Mxd1        | Mm00487504_m1 |
| Ndrp1       | Mm00440447_m1 |
| Nrp1        | Mm00435379_m1 |
| Nt5e        | Mm00501910_m1 |
| Pde3b       | Mm01271639_m1 |
| Pdim4       | Mm00450823_m1 |
| Penk1       | Mm01212875_m1 |
| Phlda1      | Mm00456345_g1 |
| Phlpp       | Mm01295850_m1 |
| Plagl1      | Mm00494251_m1 |
| Plscr1      | Mm01228223_g1 |
| Pmaip       | Mm00451763_m1 |
| Pou2af1     | Mm00448326_m1 |
| Ppm1l       | Mm00618786_m1 |
| Prg4        | Mm01284582_m1 |
| Prnp        | Mm00448389_m1 |
| Ptger2      | Mm00436051_m1 |
| Ptpn13      | Mm00478426_m1 |
| Ragef4      | Mm00517216_m1 |
| Rcn1        | Mm00485644_m1 |
| Rgs1        | Mm00450170_m1 |
| Rgs16       | Mm00803317_m1 |
| Rhoq        | Mm00467435_m1 |
| Rn18s       | Mm03928990_g1 |
| Rragd       | Mm00546741_m1 |
| Serpina3g   | Mm02602542_m1 |
| Serpib6b    | Mm00488413_m1 |
| Sgk1        | Mm00441387_g1 |
| Sh3brl2     | Mm00552919_m1 |
| Slc22a2     | Mm00457295_m1 |
| Slc22a5     | Mm00441468_m1 |
| Slc2a3      | Mm03053806_s1 |
| Socs2       | Mm01247834_m1 |
| Spry1       | Mm01285700_m1 |
| Stat3       | Mm01219775_m1 |
| Stx11       | Mm01192495_m1 |
| Swap70      | Mm00486503_m1 |
| Tiam1       | Mm01170430_m1 |
| Tmem158     | Mm02342239_s1 |
| Tmem64      | Mm00841719_m1 |
| Tnfrsf1b    | Mm00441889_m1 |
| Tnfrsf4     | Mm00442039_m1 |
| Tnfrsf9     | Mm00441899_m1 |
| Tnfsf11     | Mm00441908_m1 |
| Traf1       | Mm00493827_m1 |
| Usp27x      | Mm02526762_s1 |
| Zc3h12c     | Mm01177353_m1 |

List of 96 genes: 93 genes of interest and 3 endogenous controls, GAPDH, HPRT and Rn18s) included in a custom designed microfluidics card, TLDA (Taqman Low Density Array). Gene symbol (right) and Taqman assay ID for each gene is listed.

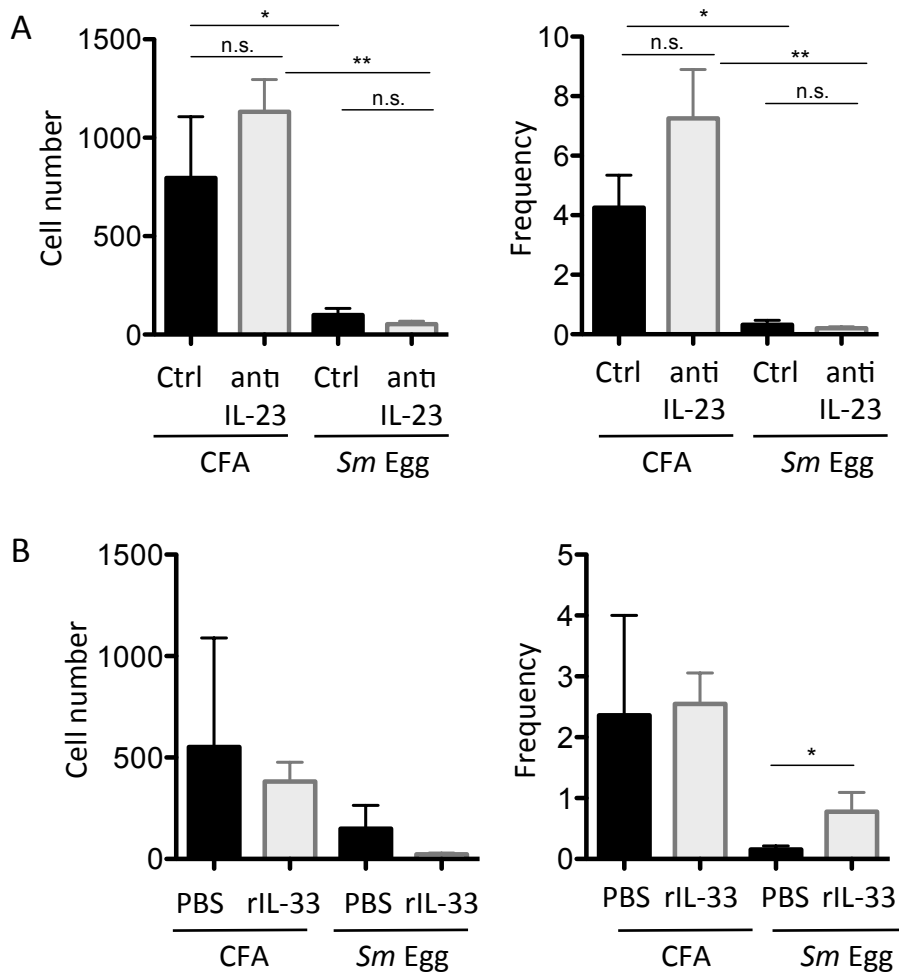

**Supplementary Figure 2.** IL-23 and IL-33 manipulations fail to boost Treg accumulation in the *Sm Egg*-induced inflamed dermis. Sorted DO11.10+ Foxp3+ Tregs (Thy1.1+) and/or DO11.10+ Foxp3- Tconv (Thy1.1/1.2+) cells were transferred to WT Balb/c (Thy 1.2+) mice and immunized with OVA and adjuvant. A) Number and frequency (of CD4) of DO11.10 Foxp3+ Tregs in the inflamed ear, d7 post-immunization, with and without blocking antibody to IL-23 i.p. on days 4, 5, 6. B) Number and frequency (of CD4) of DO11.10 Foxp3+ Tregs in the inflamed ear, d7 post-immunization, with and without rIL-33 i.p. on days 4, 5, 6. Two independent experiments. Statistics by Mann Whitney.
